# Supplementary material for: BioinspiredCamellia japonicacarbon dots with high near-infrared absorbance for efficient photothermal cancer therapy
Source: Royal Society of Chemistry journal article supplement (doi:10.1039/d1nr03999g), 2021-01-01
Supplement: d1nr03999g1.pdf [file d1nr03999g1.pdf]

## Supplementary Information

### **Bioinspired *Camellia japonica* carbon dots with high near-infrared absorbance for efficient photothermal cancer therapy**

Dohun Kim,<sup>‡a,b,c</sup> Gayoung Jo,<sup>‡d</sup> Yujin Chae,<sup>a,b,c</sup> Subramani Surendran,<sup>a,b,c</sup> Bo Young Lee,<sup>d,e</sup> Eun Jeong Kim,<sup>d</sup> Min-Kyung Ji,<sup>a,b,c</sup> Uk Sim\*<sup>a,b,c</sup> and Hoon Hyun\*<sup>d,e</sup>

<sup>a</sup>*Department of Materials Science & Engineering, Engineering Research Center, Chonnam National University, Gwangju 61186, South Korea*

<sup>b</sup>*Optoelectronics Convergence Research Center, Chonnam National University, Gwangju 61186, South Korea*

<sup>c</sup>*Future Energy Engineering Convergence, College of AI Convergence, Chonnam National University, Gwangju 61186, South Korea*

<sup>d</sup>*Department of Biomedical Sciences, Chonnam National University Medical School, Gwangju 61469, South Korea*

<sup>e</sup>*BioMedical Sciences Graduate Program (BMSGP), Chonnam National University, Hwasun 58128, South Korea*

\*Corresponding authors: [hhyun@jnu.ac.kr](mailto:hhyun@jnu.ac.kr); [usim@jnu.ac.kr](mailto:usim@jnu.ac.kr)

## Experimental Section

**Synthesis of S-CDs.** The naturally fallen *Camellia Japonica* flowers were collected from the local *Camellia japonica* trees grove in Chonnam National University (Gwangju, South Korea). The collected *Camellia Japonica* flowers were sun-dried for 2 days before smashed into powders by a mixer grinder. The Grinding of the dried *Camellia Japonica* flowers was performed on high-energy ball mill (Fritsch Pulverisette 6, Germany). The grinded biomass powders were obtained after 24 h continuous ball-milling at a rotation speed of 200 rpm. The milled powders (2 g) were dispersed in 20 mL of deionized (DI) water and placed in the Teflon-lined autoclave and maintained at 180 °C for 5 h. After cooling to room temperature, the obtained mixtures were washed and filtered by a membrane (0.22 µm pore). The resulting dark brown solution was dialyzed to obtain S-CDs with a uniform particle size distribution. The synthesized S-CDs are stored into a glass vial at 4 °C for further use.

**Characterization of S-CDs.** The elemental features and morphology of S-CDs were evaluated *via* transmission electron microscopy (TEM: Tecnai F20 ST, FEI, USA) with an energy-dispersive X-ray spectroscopy (EDS) module and atomic force microscope (AFM: XE-100, Park Systems, South Korea). The phase formation and structural analysis of S-CDs were estimated using powder X-ray diffraction (XRD: Rint-1000, Rigaku Corp., Japan), laser Raman spectrophotometry (NRS-5100, Jasco Inc., USA), and Fourier transform infrared spectroscopy (FT-IR: IRPresitge-21, Shimadzu Corp., Japan). The chemical bonding between the elements of S-CDs was measured by X-ray photoelectron spectroscopy (XPS: Multilab 2000, Thermo Fisher Scientific, UK). The amount of sulfur was examined by CHNS elemental analysis (vario MICRO cube, Elementar, Germany).

**Optical property analysis.** All optical measurements were performed in phosphate-buffered saline (PBS) at pH 7.4. Absorption spectra of S-CDs were measured using a fiber optic FLAME spectrometer (Ocean Optics, Dunedin, USA). The fluorescence emission spectra of S-CDs were analyzed using a SPARK<sup>®</sup> 10M microplate reader (Tecan, Männedorf, Switzerland) at an excitation wavelength of 360 nm and emission wavelengths ranging from 400 to 700 nm.

**Photothermal conversion efficiency of S-CDs.** Photothermal conversion efficiency was evaluated by recording the temperature change of the S-CDs (45 µg/mL) as a function of time under 808 nm laser irradiation at a power density of 1.1 W/cm<sup>2</sup> in a quartz cuvette. A FLIR<sup>®</sup> thermal imager (FLIR Systems, Wilsonville, USA) was used to record the temperature changes of the S-CD solution. The S-CD solution was continuously irradiated with a 808 nm laser until a steady temperature was reached. After the irradiation was switched off, the temperature decrease was monitored to determine the rate of heat transfer from the system. The photothermal conversion efficiency ( $\eta$ ) of the S-CDs was calculated using the following equation as reported previously:<sup>1,2</sup>

$$\eta = \frac{hA\Delta T_{\max} - Q_s}{I(1 - 10^{-A_\lambda})}$$

where  $h$  is the heat transfer coefficient,  $A$  is the surface area of the container.  $\Delta T_{\max}$  is the temperature change of the sample solution from the ambient temperature ( $T_{\text{surr}}$ , 24.8 °C) to the equilibrium temperature ( $T_{\max}$ , 71.5 °C).  $Q_s$  is the heat dissipation from the light absorbed by the quartz sample cell, which is 37.8 mW.  $I$  is the laser power density (1.1 W/cm<sup>2</sup>), and  $A_\lambda$  is the absorbance of S-CDs at 808 nm (0.1134). The value of  $hA$  can be calculated using the following equation:

$$\tau_s = \frac{m_D C_D}{hA}$$

where  $\tau_s$  is the sample system time constant,  $m_D$  and  $C_D$  are the mass (0.2 g) and heat capacity (4.2 J/g) of DI water used as a solvent, respectively. To calculate  $\tau_s$ , a dimensionless parameter ( $\theta$ ) should be acquired by following equation:

$$\theta = \frac{\Delta T}{\Delta T_{\max}}$$

where  $\Delta T$  is the temperature change of a temperature difference between the solution temperature and ambient temperature.  $\Delta T_{\max}$  is the temperature change at the maximum steady-state temperature. Thus,  $\tau$  can be determined by applying the linear time data from the cooling period versus  $\ln(\theta)$  by following equation:

$$t = -\tau (\ln \theta)$$

Therefore,  $hA$  can be calculated.

***In vitro* photothermal cytotoxicity.** HT-29 human colorectal adenocarcinoma cell line was obtained from the American Type Culture Collection (ATCC® HTB-38™, Manassas, USA). The cancer cells were cultured in Roswell Park Memorial Institute (RPMI) 1640 medium supplemented with 10% fetal bovine serum (FBS: Gibco BRL, Paisley, UK) and an antibiotic-antimycotic solution (100 units/mL penicillin, 100  $\mu$ g/mL streptomycin, and 0.25  $\mu$ g/mL amphotericin B; Welgene, Daegu, South Korea) in a humidified 5% CO<sub>2</sub> atmosphere at 37 °C. The final concentration of S-CDs (45  $\mu$ g/mL) was added when the cells attained 50~60% confluence. To visualize the photothermal therapy (PTT)-induced cell death in S-CD treated cells, PTT was performed under 808 nm laser at 1.1 W/cm<sup>2</sup> for 2 min. After PTT, the cells were allowed to incubate for another 3 h and then stained with propidium iodide (PI, a red fluorescent dye to detect dead cells) for 30 min. After washing twice with PBS, the stained cells were imaged using a Nikon Eclipse Ti-U inverted microscope system (Nikon, Seoul, South Korea). Image acquisition and

analysis were performed using NIS-Elements Basic Research software (Nikon). All fluorescence images were acquired at identical exposure times and normalized.

**Cell viability assay.** Cell toxicity and proliferation were evaluated using the alamarBlue™ (Thermo Scientific, Waltham, USA) assay. The HT-29 cells were seeded onto 96-well plates ( $1 \times 10^4$  cells per well). To determine cytotoxicity depending on the concentration, the cancer cells were treated with the S-CDs (30, 60, 100, and 200  $\mu\text{g/mL}$ ) for 1 h and cultured for 24 h after treatment. At each assay time point, the incubation cell medium was replaced with 100  $\mu\text{L}$  of fresh medium, and 10  $\mu\text{L}$  of the alamarBlue solution was directly added to each 100  $\mu\text{L}$  well; the plates were then incubated for 4 h at 37 °C in a humidified 5%  $\text{CO}_2$  incubator. Finally, the 96-well plates were placed in a microplate reader (SPARK® 10M, Tecan) to measure the absorption intensity at 570 nm and the fluorescence intensity at 590 nm. Cell viability was calculated using the following formula ( $A$  is the average absorbance): cell viability (%) =  $(A_{\text{sample}} - A_{\text{blank}})/(A_{\text{control}} - A_{\text{blank}}) \times 100$ .

**HT-29 xenograft mouse model.** Animal care, experiments, and subsequent euthanasia were performed in accordance with protocols approved by Chonnam National University Animal Research Committee (CNU IACUC-H-2017-64). Six-week old adult male NCRNU nude mice weighing approximately 25 g ( $N = 3$  independent experiments) were purchased from Orient Bio Inc. (Seongnam, South Korea). HT-29 cancer cells ( $1 \times 10^6$  cells per mouse) were harvested and suspended in 100  $\mu\text{L}$  of PBS followed by subcutaneous injection into the right flank of each mouse. When the tumors reached a size of  $\sim 1$  cm in diameter, PBS and the S-CDs were administered intratumorally. Animals were sacrificed and imaged over a certain period of time.

***In vivo* tumor imaging.** *In vivo* fluorescence imaging was performed using a FOBI fluorescence imaging system (NeoScience, Suwon, South Korea). The fluorescence signal of S-CDs injected in

tumors was monitored at 525 nm. All fluorescence images were normalized identically for all conditions. To confirm the *in vivo* antitumor effect, the macroscopic features of each group were observed at fixed time intervals for a week. The tumor volumes were calculated using the following formula:  $V = 0.5 \times \text{longest diameter} \times (\text{shortest diameter})^2$ .

**Assessment of *in vivo* photothermal effect.** HT-29 tumor-bearing mice were intratumorally administered with PBS and the S-CDs. After injection, the mice were anesthetized, and their tumor sites were laser-irradiated ( $1.1 \text{ W/cm}^2$ ,  $\lambda = 808 \text{ nm}$ ) for 5 min. Temperature changes in the tumor sites were monitored using a FLIR® thermal imager (FLIR Systems) and data were recorded from the beginning of the laser irradiation at a step-size of 1 min during the entire laser irradiation period. At 24 h post-irradiation, tumors were excised from the treated mice for subsequent histological analysis using hematoxylin and eosin (H&E) staining.

**Histological analysis.** Resected tumors were preserved for H&E staining and microscopic assessment. Samples were fixed in 4% paraformaldehyde and flash frozen in optimal cutting temperature (OCT) compound using liquid nitrogen. Frozen samples were cryosectioned ( $10 \mu\text{m}$  in thickness per slide), stained with H&E, and observed by microscopy. Histological imaging was performed on a Nikon Eclipse Ti-U inverted microscope system. Image acquisition and analysis was performed using NIS-Elements Basic Research software (Nikon).

**TUNEL assay.** Tumor tissues were collected from the S-CD and laser-treated group to confirm an observation of apoptotic cell death. They were fixed in 4% paraformaldehyde at  $-20 \text{ }^\circ\text{C}$  for 30 min and cryosectioned ( $10 \mu\text{m}$  in thickness per slide). Then, the samples were washed with PBS and incubated with a terminal deoxynucleotide transferase-mediated dUTP nick end labeling (TUNEL) reagent containing terminal deoxynucleotidyl transferase and fluorescent isothiocyanate

dUTP using a DeadEnd™ Fluorometric TUNEL System (Promega, Madison, USA). After incubation, they were stained with DAPI (1 µg/mL) for 30 min to investigate the cell nucleus by UV light microscopic observations (blue). Fluorescence imaging was performed on a Nikon Eclipse Ti-U inverted microscope system. Image acquisition and analysis was performed using NIS-Elements Basic Research software (Nikon). All fluorescence images were acquired at identical exposure times and normalized.

**Statistical analysis.** Statistical analysis was carried out using a one-way ANOVA followed by Tukey's multiple comparisons test. Differences were considered to be statistically significant at a level of  $p < 0.05$ . Results were presented as mean  $\pm$  S.D. and curve fitting was performed using Prism version 4.0a software (GraphPad, San Diego, USA).

**Table S1** Comparison of the PTT conditions and photothermal conversion efficiency between S-CDs and previously reported CDs.

| Reference         | Carbon source                           | Dose<br>( $\mu\text{g/mL}$ ) | Laser<br>power<br>( $\text{W/cm}^2$ ) | Laser<br>wavelength<br>(nm) | Irradiation<br>time<br>(min) | Conversion<br>efficiency<br>(%) |
|-------------------|-----------------------------------------|------------------------------|---------------------------------------|-----------------------------|------------------------------|---------------------------------|
| 3                 | Citric & nitric acid solutions          | 20,000                       | 2                                     | 808                         | 10                           | 3.77                            |
| 4                 | Watermelon juices                       | 20,000                       | 1.4                                   | 808                         | 10                           | 30.6                            |
| 5                 | <i>Hypocrella bambusae</i> fungi        | 2,000                        | 0.8                                   | 635                         | 10                           | 27.6                            |
| 6                 | Cyanine dye & poly(ethylene glycol)     | 800                          | 2                                     | 808                         | 10                           | 38.7                            |
| 7                 | Ayurvedic plants                        | 500                          | 0.5                                   | 750                         | 10                           | -                               |
| <b>This study</b> | <b><i>Camellia japonica</i> flowers</b> | <b>45</b>                    | <b>1.1</b>                            | <b>808</b>                  | <b>5</b>                     | <b>55.4</b>                     |



**Table S2** The CHNS elemental analysis of S-CDs.

| CD component                        | S<br>(wt%) | C<br>(wt%) | N<br>(wt%) | H<br>(wt%) |
|-------------------------------------|------------|------------|------------|------------|
| <i>Camellia japonica</i><br>flowers | 4.915      | 64.734     | 0.327      | 4.848      |

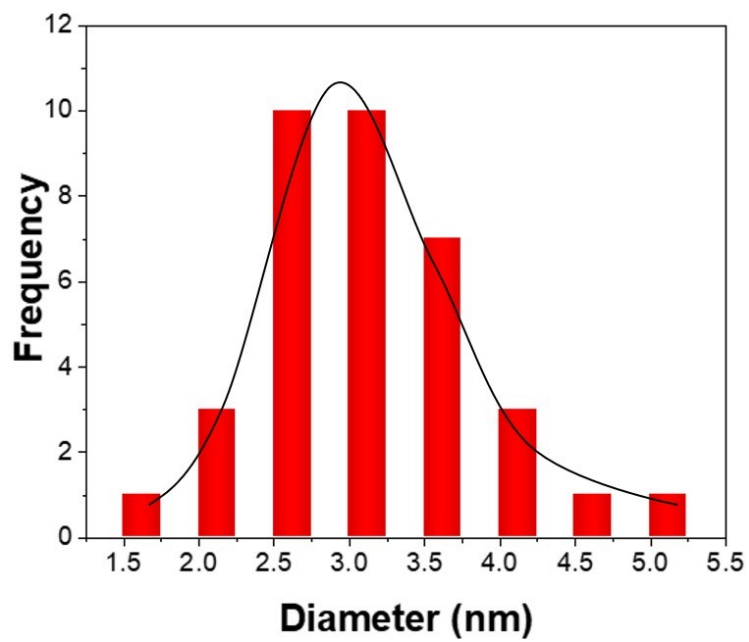

**Fig. S1** Average size distribution of S-CDs by the TEM images.

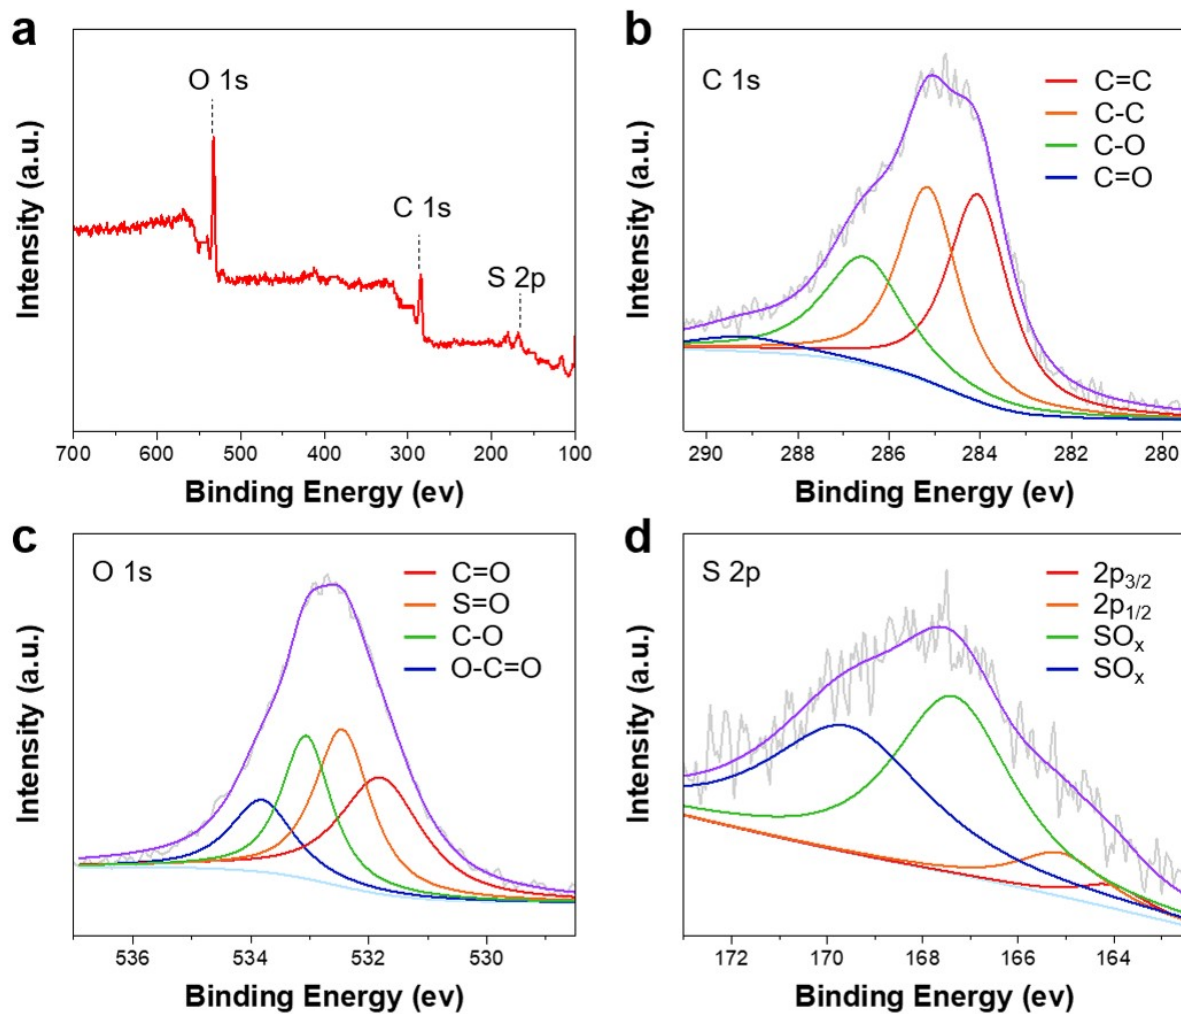

**Fig. S2** (a) Full survey XPS spectra of the S-CDs. (b) C 1s, (c) O 1s, and (d) S 2p XPS spectra of the S-CDs.

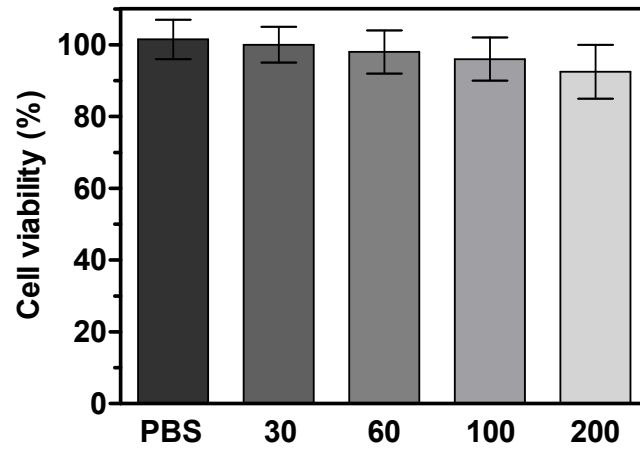

**Fig. S3** Cell viability assay of the S-CDs using HT-29 cancer cells. The percentage cytotoxicity was determined after 24 h of treatment with various concentrations of the S-CDs.

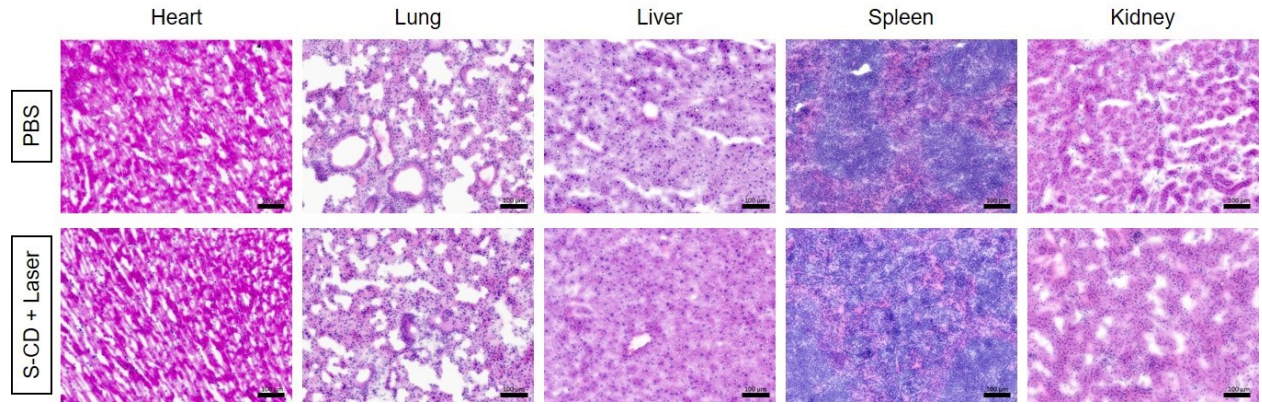

**Fig. S4** H&E stained images of major organs including heart, lung, liver, spleen, and kidney tissues after PBS and PTT treatments. Images are representative of three independent experiments. Scale bars = 100 µm.

## References

- 1 B. Geng, D. Yang, D. Pan, L. Wang, F. Zheng, W. Shen, C. Zhanga and X. Li, *Carbon*, 2018, **134**, 153–162.
- 2 Y. Liu, K. Ai, J. Liu, M. Deng, Y. He and L. Lu, *Adv. Mater.*, 2013, **25**, 1353–1359.
- 3 C. Lee, W. Kwon, S. Beack, D. Lee, Y. Park, H. Kim, S. K. Hahn, S. W. Rhee and C. Kim, *Theranostics*, 2016, **6**, 2196–2208.
- 4 Y. Li, G. Bai, S. Zeng and J. Hao, *ACS Appl. Mater. Interfaces*, 2019, **11**, 4737–4744.
- 5 Q. Jia, X. Zheng, J. Ge, W. Liu, H. Ren, S. Chen, Y. Wen, H. Zhang, J. Wu and P. Wang, *J. Colloid Interf. Sci.*, 2018, **526**, 302–311.
- 6 M. Zheng, Y. Li, S. Liu, W. Q. Wang, Z. G. Xie and X. B. Jing, *ACS Appl. Mater. Interfaces*, 2016, **8**, 23533–23541.
- 7 R. Meena, R. Singh, G. Marappan, G. Kushwaha, N. Gupta, R. Meena, J. P. Gupta, R. R. Agarwal, N. Fahmi and O. S. Kushwaha, *Heliyon*, 2019, **5**, e02483.
